# Supplementary material for: Incidental Congestive Heart Failure in Patients With Aldosterone‐Producing Adenomas
Source: PubMed Central journal article supplement — J Am Heart Assoc. 2019 Dec 5;8(24):e012410. doi: 10.1161/JAHA.119.012410 (PMC6951059; doi:10.1161/jaha.119.012410), 2019-12-05
Supplement: JAH3-8-e012410-s001.pdf [file JAH3-8-e012410-s001.pdf]

# **Supplemental Material**

## Data S1.

### Identification of primary aldosteronism from the National Health Insurance Research Databases

#### ***Material and Methods***

Our population-based retrospective cohort study is based on data from the National Health Insurance Research Databases (NHIRD) dating between 1997 and 2009. The NHIRD has been implemented in Taiwan since 1995 and is one of the largest and most comprehensive databases in the world, having been used extensively in various studies.<sup>1-3</sup> The National Health Insurance (NHI) covers almost all of the 23.7 million people living in Taiwan and contains medical information about outpatient visits, hospital admissions, prescriptions, interventional procedures, disease profiles, and vital status.<sup>4,5</sup> The NHI Administration (NHIA) routinely checks for data accuracy and thus reliability.<sup>6-8</sup>

We have proved the abovementioned hypothesis of such identification of PA diagnosis by using multi-center medical records as the "gold standard" and matched with the TNHI reimbursement records.<sup>2</sup> The diagnosis of PA is according to clinical judgment. In order to increase the diagnostic specificity, we used validated algorithm to enroll PA patients. Our strategy, based on a combination of PA ICD-9 codes, and spironolactone claim, had the highest positive predictive value (PPV) for the identification of patients with PA. Using 3 out-patient visits or one inpatient has higher PPVs than one outpatient or one inpatient record. PPVs varied with different algorithms with PA code: PPV for antihypertensive drugs in use (PPV= 66.9%, 95%CI = 63.0%-70.6%), claims with hypokalemia and antihypertensive drug in use (PPV= 89.4%, 95%CI = 85.4%-93.0%), and final decisions of clinical certainty of PA with spironolactone in use<sup>2</sup> (PPV= 93.4%, 95%CI = 89.4%-97.0%). By searching the procedure codes, we analyzed the ratio of image study, adrenal venous sampling (AVS), and postural stimulation tests among the PA patients in this study. Since the diagnostic and procedure codes were for insurance reimbursement, they were recorded with high accuracy, and it reflected the 'real-world practice' to identify aldosteronism in Taiwan during the past decade (Table S1). In order to validate the diagnostic tests from the NHI database, we scrutinized the database of TAIPAI (the patients in the database of TAIPAI are included as a fraction of the whole NHI database; but more detailed clinical parameters of the patients are available from TAIPAI than from NHI database, because the former is a multicenter quality-control data registry, while the latter is a population-base health insurance data registry). The TAIPAI study group included two medical centers (National Taiwan University

Hospital (NTUH), Taipei, Taiwan; Taipei University Hospital, Taipei, Taiwan), and five regional hospitals (Cardinal Tien Hospital, New Taipei City, Taiwan; Taipei Tzu Chi Hospital, New Taipei City, Taiwan; Yun-Lin Branch of NTUH, Douliou City, Taiwan; Hsin-Chu Branch of NTUH, Hsin-Chu City, Taiwan; Zhongxing Branch of Taipei City Hospital, Taipei, Taiwan). Because there is no specific ICD-9 diagnosis of aldosterone producing adenoma, PA patients with the diagnosis of adrenal tumor (ICD-9 code =227, 227.0, 239.7) were further analyzed as a specificity test.

## Results

<sup>131</sup>I-6 $\beta$ -Iodomethyl-19-Norcholesterol SPECT/CT (NP-59 SPECT/CT) plays an important ancillary role, especially among those patients for whom AVS was unavailable and CT showed a unilateral adrenal mass. Currently iodocholesterol scintigraphy is no longer used in some countries, like the United States (U.S.), but remains available in Taiwan, Japan and other countries. It has the ability similar to conventional visual scale (VS) in differentiating APA from IAH, and yet an excellent ability to predict postsurgical outcomes of adrenalectomy<sup>9</sup>.

CT scan, postural stimulation and AVS were the leading procedures to identify APA from our two datasets<sup>3</sup> (the NHI dataset of the current article and the TAIPAI dataset) (Table S2). Salt loading test is the most commonly used diagnostic procedure to identify PA from the TAIPAI database. From TAIPAI cohort, we notice that the diagnostic utility of AVS and posture stimulation tests was almost the same as that from the NHI database. Most of the hospitals from the TAIPAI group were equipped with the capacity of NP-59 SPECT/CT, and therefore the diagnostic utility of NP-59 SPECT/CT was higher than that from the NHI database.

In Taiwan, patients who received captopril tests showed a sensitivity of 66.2% and a specificity of 89.1%.<sup>10</sup> According to our previous validation, the NP-59 for Primary Aldosteronism patients showed an accuracy of 77.4% for predicting pathological change of aldosteronism<sup>11</sup>; However NP-59 semi-quantification in differentiating APA could reach the accuracy of 85.7%.<sup>9</sup>

The result of our AVS among the TAIPAI dataset showed that 44.7% of PA patients were found to have lateralized hypersecretion of aldosterone (i.e.: APA; including 32.7% with lateralization towards the right and 12% with lateralization towards the left), and no lateralization could be identified among the other 55.3% PA patient; i.e.: idiopathic adrenal hyperplasia).

For the comparison between patients with aldosterone producing adenoma who were treated with surgery versus MRA, PA patients with the diagnosis of adrenal tumor (ICD-9 code =227, 227.0, 239.7) were further analyzed as a specificity test

from TAIPAI cohort. In our dataset, among the patients who underwent adrenalectomy and had the ICD-9 record of an adrenal tumor, there was a very high positive predictive value (96%) of APA. Furthermore, in the specificity test of this study we chose- only to include those confirmed APA patients to run the test, which although sacrificed some sensitivity, increased the positive predictive rate. In such a conservative way, we are confident to report the beneficial effects of adrenalectomy on the all-cause mortality among these APA patients.

Among the patients who underwent AVS we further identified those patients with incidentaloma (not APA) and contralateral adrenal aldosteronism, and compared them with the previously mentioned combo coding of PA and adrenal tumor. The result showed a high incidence of such discrepancy (99.2%) and indirectly confirmed the high specificity of coding about adrenal adenoma among PA patients as APA.<sup>8</sup>

**Table S1. The details of diagnostic procedures from national health insurance data<sup>12</sup>**

|                        | <i>Before Match</i> |              |          | <i>After Match*</i> |                   |          |
|------------------------|---------------------|--------------|----------|---------------------|-------------------|----------|
|                        | No Operation        | Operation    | <i>p</i> | No Operation        | Operation (n=822) | <i>p</i> |
|                        | (n=2516)            | (n=846)      |          | (n=822)             |                   |          |
| <b>Male sex</b>        | 1188 (47.2%)        | 369 (43.6%)  | 0.073    | 358 (43.6%)         | 360 (43.8%)       | 0.960    |
| <b>Age (year)</b>      | 52.91 ± 15.44       | 46.6 ± 10.85 | <0.001   | 46.9 ± 13.7         | 46.9 ± 10.8       | 0.447    |
| <b>Age &lt; 35 y/o</b> | 292 (11.6%)         | 114(13.5%)   | 0.161    | 140(17.0%)          | 107(13.0%)        | 0.027    |
| <b>Age &lt; 40 y/o</b> | 521(20.7%)          | 226(26.7%)   | <0.001   | 256(31.1%)          | 208(25.3%)        | 0.010    |
| <b>Subtype</b>         |                     |              |          |                     |                   |          |
| <b>CT</b>              | 1481(58.9%)         | 539(63.7%)   | 0.017    | 529(64.4%)          | 520(63.3%)        | 0.692    |
| <b>MRI</b>             | 808(32.1%)          | 283(33.5%)   | 0.391    | 267(32.5%)          | 278(33.8%)        | 0.289    |
| <b>AVS</b>             | 471(18.7%)          | 190(22.5%)   | 0.023    | 151(18.4%)          | 195(23.7%)        | 0.020    |
| <b>NP-59</b>           | 304(12.1%)          | 113(13.4%)   | 0.186    | 99(12.0%)           | 129(12.9%)        | 0.343    |
| <b>Posture</b>         | 1085(43.1%)         | 413(48.8%)   | 0.336    | 379(46.1%)          | 399(48.5%)        | 0.421    |

AVS, adrenal venous sampling, CT, computer tomography, MRI, Magnetic Resonance Imaging, NP-59, 131I-6β-Iodomethyl-19-Norcholesterol SPECT/CT

Table S2. Details of diagnostic procedures from TAIPAI database<sup>12</sup>.

| Total 563 patients       | No Operation<br>(n=330) | Operation<br>(n=233) | P      |
|--------------------------|-------------------------|----------------------|--------|
| Male sex                 | 159(48.2%)              | 111(47.6%)           | 0.932  |
| Age (in year)year)       | 56.1 ± 12.5             | 52.2 ± 11.8          | <0.001 |
| Age <35 year old         | 24 (7.2%)               | 28 (12.0%)           | 0.096  |
| Age <40 year old         | 52(15.8%)               | 56(24.0%)            | 0.026  |
| <b>Confirmation test</b> |                         |                      |        |
| Capoten test             | 109(33.0%)              | 55(23.6%)            | 0.018  |
| Salt loading test        | 205(62.1%)              | 134(57.5%)           | 0.294  |
| <b>Subtype</b>           |                         |                      |        |
| CT                       | 307(93.0%)              | 212(91%)             | 0.426  |
| MRI                      | 63(19.1%)               | 46(19.7%)            | 0.914  |
| AVS                      | 82(24.8%)               | 61(26.2%)            | 0.423  |
| NP-59                    | 66(20.0%)               | 52(22.3%)            | 0.256  |
| Posture                  | 158 (47.9%)             | 105 (45.1%)          | 0.398  |

## Detailed information regarding to comparison of PA and EH

Table S3 showed baseline characteristics of all study population. Of the 2,391 newly diagnosed PA patients enrolled in this study, 1,307 (54.7%) were female. 151 (6.3%) patients in the PA group had new-onset CHF and 279 patients (11.7%) in the PA group died. After targeted treatment, the incidence of new onset CHF was of 11.8 per 1000-person year in the PA group. The incidence of mortality and CHF were lower among the PA group after targeted treatment than that of the EH group (Incidence rate of CHF, EH vs. PA = 13.7 vs. 11.8; incidence rate of Mortality, EH vs. PA = 24.1 vs. 20.8, Table S2). Regarding to comparison of PA/EH (Table S4), in the comparison of PA and EH group, the risk of CHF was not significantly different between both groups (adjusted hazard ratio (HR)=0.87, CI: 0.73-1.03, p = 0.109, Table S2), but the risk of all-causes mortality was lower in PA group (adjusted hazard ratio (HR)=0.87, CI: 0.76-0.099, p = 0.35, Table S2).

**Table S3. Baseline Characteristics of all Study Population.**

| Variables          | Matched PA/EH    |                  | p     | Std    |
|--------------------|------------------|------------------|-------|--------|
|                    | EH<br>(n = 9564) | PA<br>(n = 2391) |       |        |
| Propensity score   | -4.04 ± 1.58     | -4.04 ± 1.58     | 0.997 | 0.000  |
| Sex                |                  |                  |       |        |
| Women              | 5013 (52.42%)    | 1307 (54.66%)    | 0.050 | -0.045 |
| Men                | 4551 (47.58%)    | 1084 (45.34%)    |       | -0.045 |
| Age                | 49.98 ± 13.98    | 49.98 ± 13.98    | 0.999 | 0.000  |
| Urbanization level |                  |                  |       |        |

|                                    |               |               |       |        |
|------------------------------------|---------------|---------------|-------|--------|
| <b>Urban</b>                       | 4428 (46.30%) | 1124 (47.01%) |       | -0.008 |
| <b>Suburban</b>                    | 2543 (26.59%) | 644 (26.93%)  | 0.581 | -0.006 |
| <b>Rural</b>                       | 2593 (27.11%) | 623 (26.06%)  |       | 0.022  |
| <b>Monthly income, n (%)</b>       |               |               |       |        |
| <b>&lt;NT\$19100</b>               | 5637 (58.94%) | 1443 (60.35%) |       | -0.014 |
| <b>NT\$19100–NT\$41999</b>         | 3240 (33.88%) | 789 (33.00%)  | 0.397 | 0.013  |
| <b>≥NT\$42000</b>                  | 687 (7.18%)   | 159 (6.65%)   |       | 0.021  |
| <b>Comorbidity</b>                 |               |               |       |        |
| <b>Cerebrovascular disease</b>     | 630 (6.59%)   | 178 (7.44%)   | 0.145 | 0.034  |
| <b>CKD</b>                         | 175 (1.83%)   | 54 (2.26%)    | 0.182 | 0.030  |
| <b>COPD</b>                        | 445 (4.65%)   | 123 (5.14%)   | 0.308 | 0.023  |
| <b>Coronary artery disease</b>     | 51 (0.53%)    | 14 (0.59%)    | 0.756 | 0.007  |
| <b>Dementia</b>                    | 55 (0.58%)    | 10 (0.42%)    | 0.437 | -0.022 |
| <b>Diabetes Mellitus</b>           | 1140 (11.92%) | 307 (12.84%)  | 0.220 | 0.028  |
| <b>Hemiplegia</b>                  | 52 (0.54%)    | 18 (0.75%)    | 0.231 | 0.026  |
| <b>Liver disease</b>               | 566 (5.92%)   | 127 (5.31%)   | 0.282 | -0.026 |
| <b>Peptic Ulcer</b>                | 715 (7.48%)   | 182 (7.61%)   | 0.828 | 0.005  |
| <b>Peripheral vascular disease</b> | 59 (0.62%)    | 9 (0.38%)     | 0.222 | -0.034 |
| <b>RA</b>                          | 50 (0.52%)    | 7 (0.29%)     | 0.183 | -0.036 |
| <b>Solid tumor</b>                 | 236 (2.47%)   | 60 (2.51%)    | 0.883 | 0.003  |
| <b>SLE</b>                         | 20 (0.21%)    | 6 (0.25%)     | 0.629 | 0.009  |
| <b>Atrial fibrillation</b>         | 69 (0.72%)    | 17 (0.71%)    | 0.999 | -0.001 |
| <b>Dyslipidemia</b>                | 1376 (14.39%) | 336 (14.05%)  | 0.695 | -0.010 |
| <b>Parkinson disease</b>           | 48 (0.50%)    | 15 (0.63%)    | 0.432 | 0.017  |
| <b>Medication for hypertension</b> |               |               |       |        |
| <b>Alpha-Blocker</b>               | 566 (5.92%)   | 155 (6.48%)   | 0.313 | 0.023  |
| <b>ACEI or ARB</b>                 | 3723 (38.93%) | 918 (38.39%)  | 0.639 | -0.011 |
| <b>Beta-Blocker</b>                | 4495 (47.00%) | 1080 (45.17%) | 0.114 | -0.037 |
| <b>Calcium-Channel Blocker</b>     | 5793 (60.57%) | 1439 (60.18%) | 0.743 | -0.008 |
| <b>Diuretic</b>                    | 3934 (41.13%) | 992 (41.49%)  | 0.763 | 0.007  |
| <b>Other Medication</b>            |               |               |       |        |
| <b>Aspirin</b>                     | 527 (5.51%)   | 140 (5.86%)   | 0.517 | 0.015  |
| <b>Clopidogrel</b>                 | 120 (1.25%)   | 29 (1.21%)    | 0.918 | -0.004 |
| <b>Ticlopidine</b>                 | 85 (0.89%)    | 24 (1.00%)    | 0.630 | 0.012  |
| <b>Warfarin</b>                    | 60 (0.63%)    | 16 (0.67%)    | 0.775 | 0.005  |



|                             |               |               |       |        |
|-----------------------------|---------------|---------------|-------|--------|
| <b>PPI</b>                  | 343 (3.59%)   | 90 (3.76%)    | 0.669 | 0.009  |
| <b>H2 blocker</b>           | 854 (8.93%)   | 214 (8.95%)   | 0.968 | 0.001  |
| <b>Statin</b>               | 801 (8.38%)   | 205 (8.57%)   | 0.742 | 0.007  |
| <b>NSAID</b>                | 4566 (47.74%) | 1151 (48.14%) | 0.731 | 0.008  |
| <b>Steroid</b>              | 874 (9.14%)   | 224 (9.37%)   | 0.722 | 0.008  |
| <b>SSRI</b>                 | 244 (2.55%)   | 55 (2.30%)    | 0.511 | -0.016 |
| <b>Nitrate</b>              | 17 (0.18%)    | 7 (0.29%)     | 0.303 | 0.024  |
| <b>Outcome of interests</b> |               |               |       |        |
| <b>CHF</b>                  | 671 (7.02%)   | 151 (6.32%)   | 0.240 | -0.028 |
| <b>Mortality</b>            | 1257 (13.14%) | 279 (11.67%)  | 0.056 | -0.045 |

ACEI: Angiotensin-Converting-Enzyme Inhibitor; APA: Aldosterone Producing Adenoma; ARB: Angiotensin Receptor Blocker; CHF: Congestive Heart Failure; CKD: Chronic Kidney Disease; COPD: Chronic Obstructive Pulmonary Disease; EH: Essential Hypertension; H2 blocker: Histamine-2 receptor antagonist; NT\$: New Taiwan dollar; NSAID: NonSteroidal Anti-Inflammatory Drug; PA: Primary Aldosteronism; PPI: Proton-Pump Inhibitor; RA: Rheumatoid Arthritis; SLE: Systemic Lupus Erythematosus; SSRI: Selective Serotonin Reuptake Inhibitors

**Table S4. Incidence rate of CHF, Mortality and HRs (PA and EH).**

| Variables                      | Events              | Person-<br>Years | Incidence<br>Rate*  | Events    | Person-<br>Years               | Incidence<br>Rate* |
|--------------------------------|---------------------|------------------|---------------------|-----------|--------------------------------|--------------------|
|                                | <b>EH</b>           |                  |                     | <b>PA</b> |                                |                    |
| <b>CHF</b>                     | 671                 | 49133            | 13.7                | 151       | 12830                          | 11.8               |
| <b>Mortality</b>               | 1257                | 52191            | 24.1                | 279       | 13408                          | 20.8               |
| <b>Comparison of PA and EH</b> |                     |                  |                     |           |                                |                    |
|                                | HR                  | p                | Adjusted<br>HR      | p         | HR Competing<br>with mortality | p                  |
| <b>PA/EH</b>                   |                     |                  |                     |           |                                |                    |
| <b>CHF</b>                     | 0.87<br>[0.73,1.04] | 0.136            | 0.87<br>[0.73,1.03] | 0.109     | 0.88<br>[0.74,1.05]            | 0.150              |
| <b>Mortality</b>               | 0.87<br>[0.76,0.99] | <0.031           | 0.87<br>[0.76,0.99] | 0.035     |                                |                    |

\*: Per 1000 Person-Years

APA: aldosterone producing adenoma; CHF, congestive heart failure; EH, essential hypertension; HR, hazard ratio; PA, primary aldosteronism

## Supplemental References:

1. Wu VC, Wu CH, Huang TM, Wang CY, Lai CF, Shiao CC, Chang CH, Lin SL, Chen YY, Chen YM, Chu TS, Chiang WC, Wu KD, Tsai PR, Chen L, Ko WJ and Group N. Long-term risk of coronary events after AKI. *J Am Soc Nephrol*. 2014;25:595-605.
2. Wu VC, Hu YH, Wu CH, Kao CC, Wang CY, Yang WS, Lee HH, Chang YS, Lin YH, Wang SM, Chen L, Wu KD and Group TS. Administrative data on diagnosis and mineralocorticoid receptor antagonist prescription identified patients with primary aldosteronism in Taiwan. *J Clin Epidemiol*. 2014;67:1139-49.
3. Wu VC, Chueh SJ, Chen L, Chang CH, Hu YH, Lin YH, Wu KD, Yang WS and Group TS. Risk of new-onset diabetes mellitus in primary aldosteronism: a population study over 5 years. *J Hypertens*. 2017;35:1698-1708.
4. Wang WJ, Chao CT, Huang YC, Wang CY, Chang CH, Huang TM, Lai CF, Huang HY, Shiao CC, Chu TS, Chen YM, Wu VC, Ko WJ, Wu KD and National Taiwan University Study Group on Acute Renal F. The impact of acute kidney injury with temporary dialysis on the risk of fracture. *J Bone Miner Res*. 2014;29:676-84.
5. Lai TS, Wang CY, Pan SC, Huang TM, Lin MC, Lai CF, Wu CH, Wu VC, Chien KL and National Taiwan University Hospital Study Group on Acute Renal F. Risk of developing severe sepsis after acute kidney injury: a population-based cohort study. *Crit Care*. 2013;17:R231.
6. Lin CC, Lai MS, Syu CY, Chang SC and Tseng FY. Accuracy of diabetes diagnosis in health insurance claims data in Taiwan. *J Formos Med Assoc*. 2005;104:157-63.
7. Cheng CL, Kao YH, Lin SJ, Lee CH and Lai ML. Validation of the National Health Insurance Research Database with ischemic stroke cases in Taiwan. *Pharmacoepidemiol Drug Saf*. 2011;20:236-42.
8. Wu VC, Chang CH, Wang CY, Lin YH, Kao TW, Lin PC, Chu TS, Chang YS, Chen L, Wu KD and Chueh SJ. Risk of Fracture in Primary Aldosteronism: A Population-Based Cohort Study. *J Bone Miner Res*. 2017;32:743-752.
9. Lee BC, Chang CC, Liu KL, Chang YC, Wu VC and Huang KH. Evaluation of right adrenal vein anatomy by Dyna computed tomography in patients with primary aldosteronism. *Sci Rep*. 2016;6:28305.
10. Wu VC, Chang HW, Liu KL, Lin YH, Chueh SC, Lin WC, Ho YL, Huang JW, Chiang CK, Yang SY, Chen YM, Wang SM, Huang KH, Hsieh BS, Wu KD and Group TS. Primary aldosteronism: diagnostic accuracy of the losartan and captopril tests. *Am J*

*Hypertens.* 2009;22:821-7.

11. Yen RF, Wu VC, Liu KL, Cheng MF, Wu YW, Chueh SC, Lin WC, Wu KD, Tzen KY, Lu CC and Group TS. <sup>131</sup>I-6beta-iodomethyl-19-norcholesterol SPECT/CT for primary aldosteronism patients with inconclusive adrenal venous sampling and CT results. *J Nucl Med.* 2009;50:1631-7.

12. Wu VC, Wang SM, Chang CH, Hu YH, Lin LY, Lin YH, Chueh SC, Chen L and Wu KD. Long term outcome of Aldosteronism after target treatments. *Sci Rep.* 2016;6:32103.
